# Supplementary material for: Genome‐wide single‐nucleotide polymorphism data reveal cryptic species within cryptic freshwater snail species—The case of the Ancylus fluviatilis species complex
Source: PubMed Central journal article supplement (PMC5773296; doi:10.1002/ece3.3706), 2017-12-16
Supplement: ECE3-8-1063-s001.pdf [file ECE3-8-1063-s001.pdf]

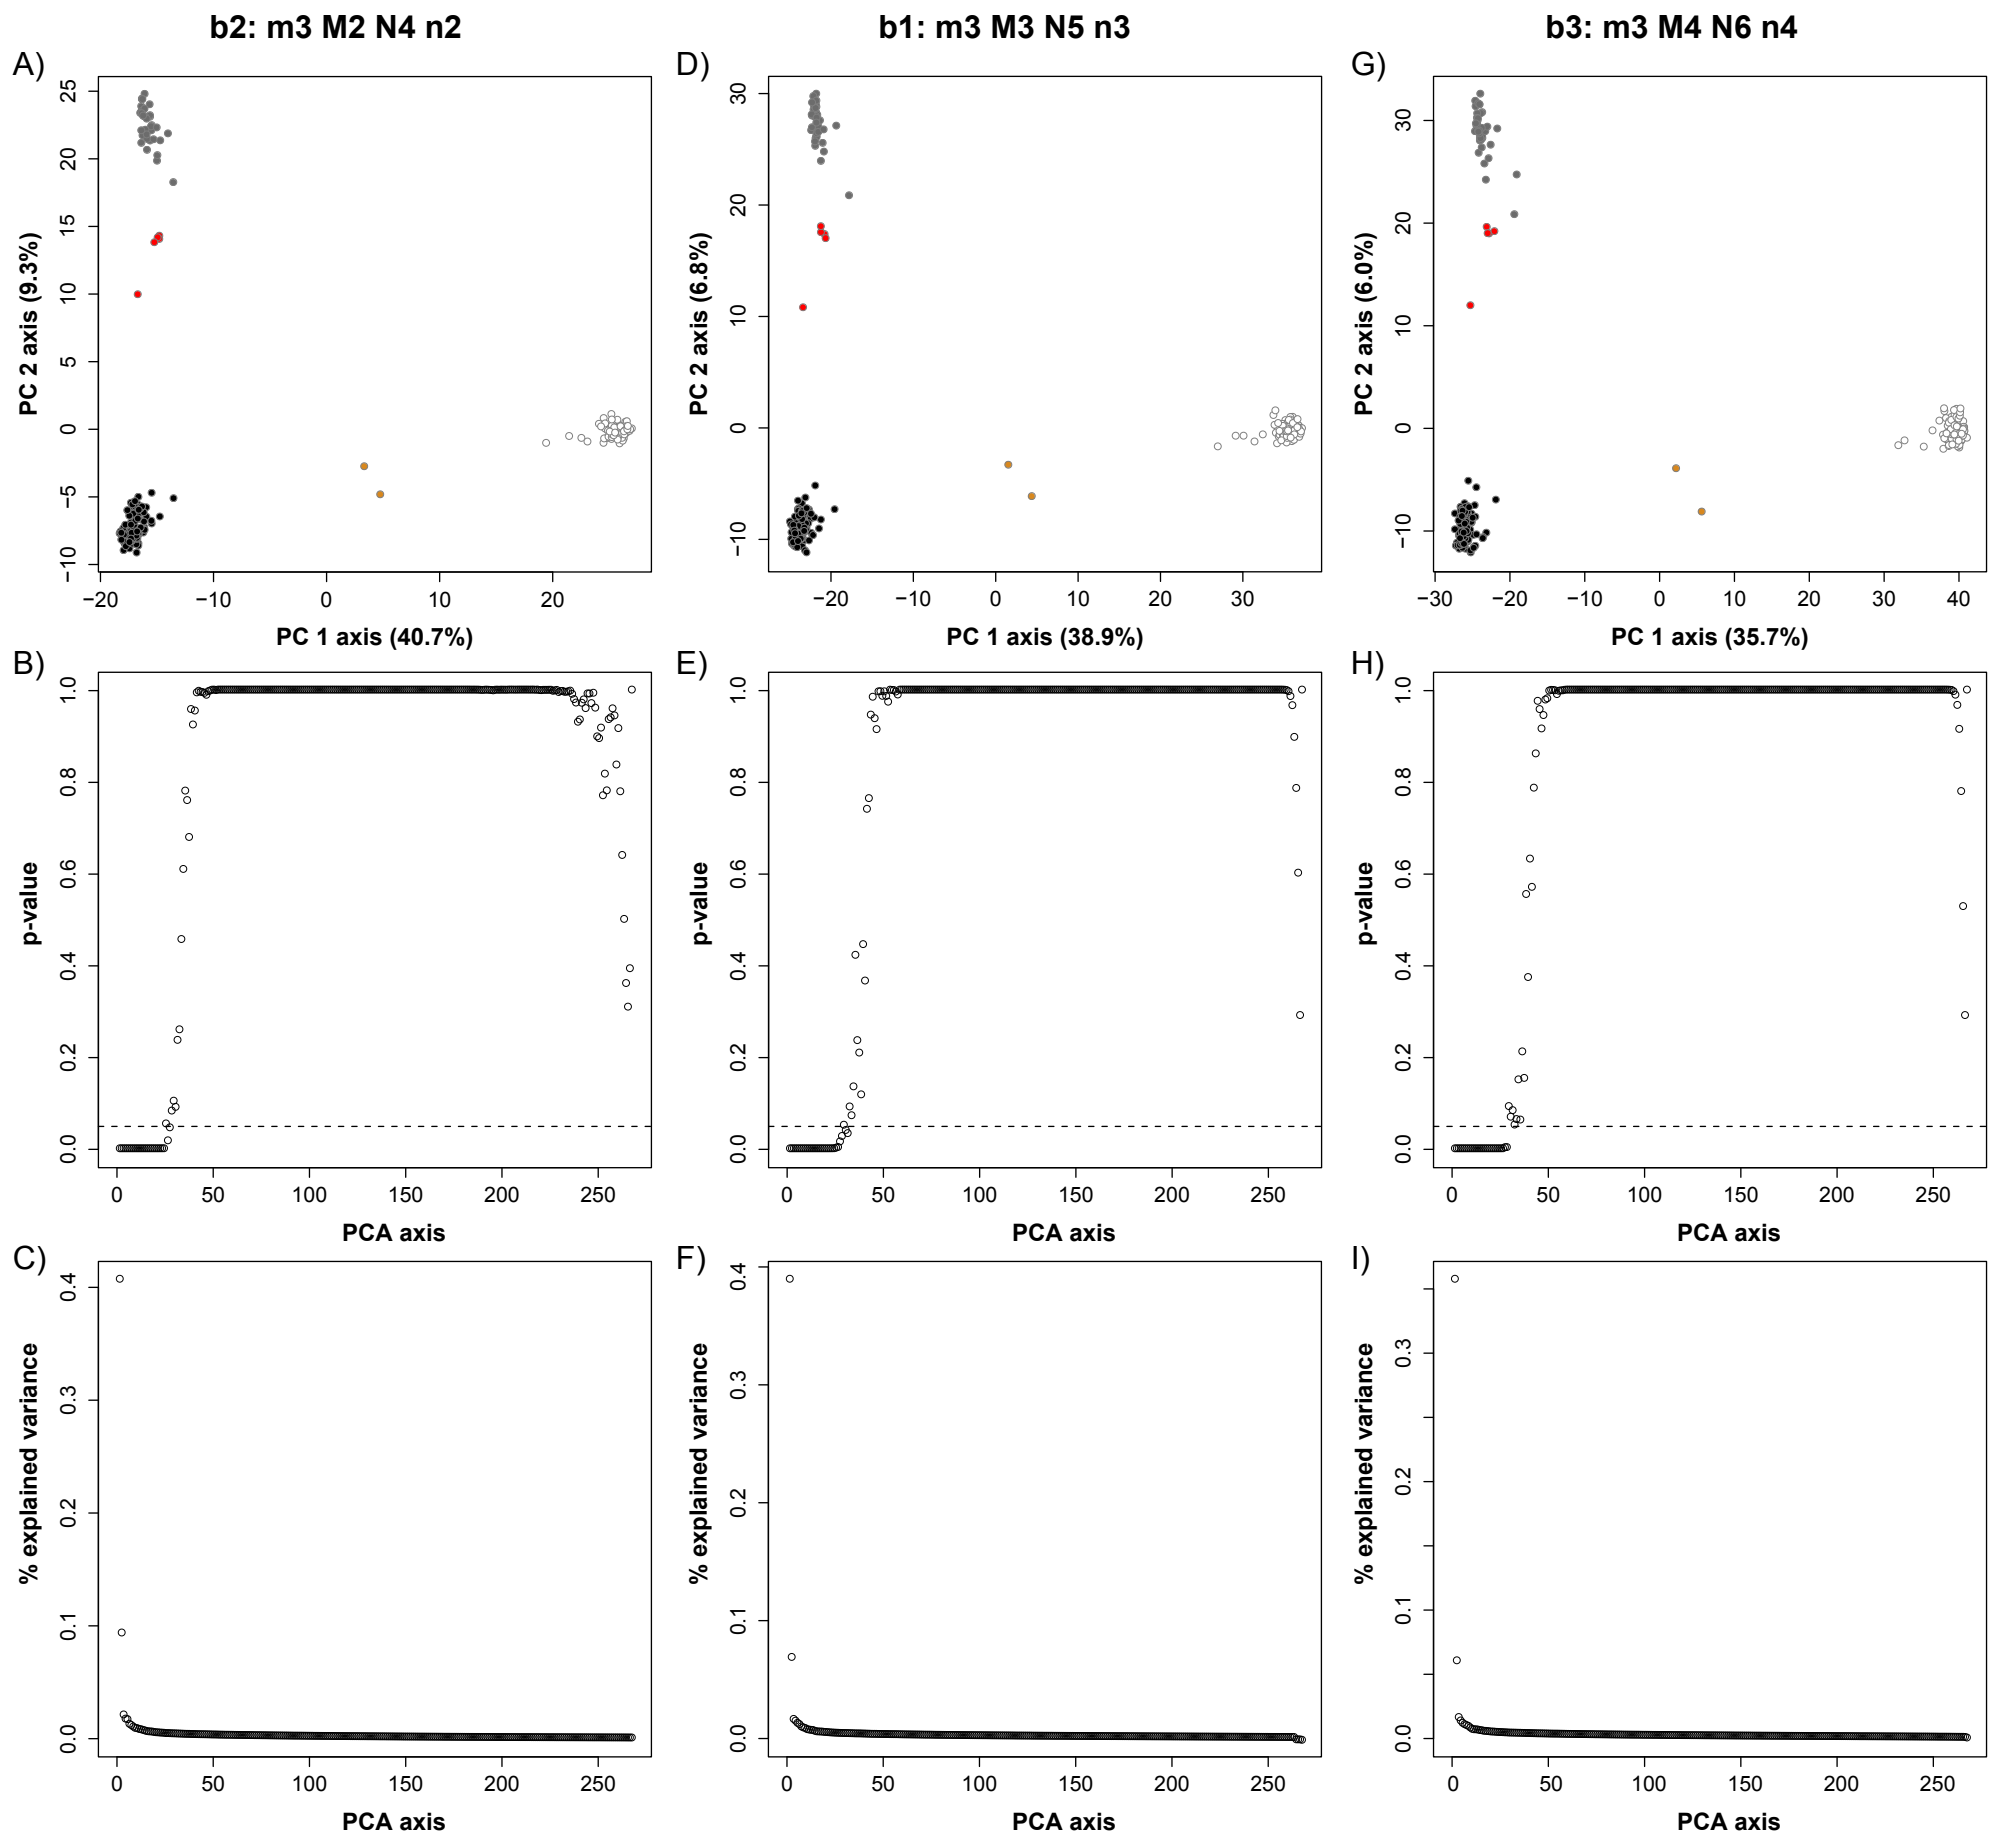

**Figure S1.** Principle component analysis of the filtered ddRAD dataset. A-C, D-E and G-I show results for the different stacks settings, b2, b1 and b3, respectively. A, D and G are scatterplots showing the first two principal components (PCs), percentage of explained variance by the respective axes is given in brackets. Specimens of *Af I* are colored in black, of *Af II* in white, of *Af III* in grey, *Af I–II* hybrids in orange and *Af I–III* hybrids in red. In B, E and H p-values for all axes are shown with points below the vertical dashed line indicating significance of axes ( $p < 0.05$ ). Plots C, F and I show the percentage of variance explained by each axis.
