# Supplementary material for: Genome‐wide single‐nucleotide polymorphism data reveal cryptic species within cryptic freshwater snail species—The case of the Ancylus fluviatilis species complex
Source: PubMed Central journal article supplement (PMC5773296; doi:10.1002/ece3.3706), 2017-12-16
Supplement: ECE3-8-1063-s002.pdf [file ECE3-8-1063-s002.pdf]

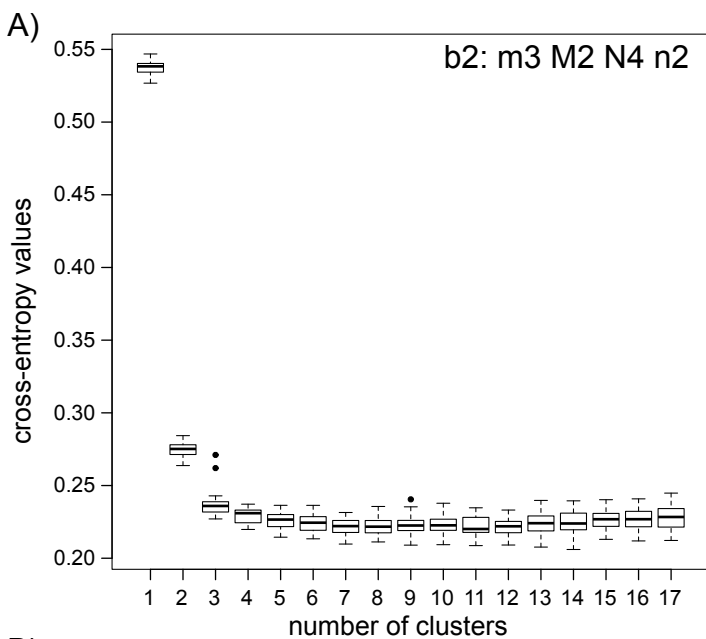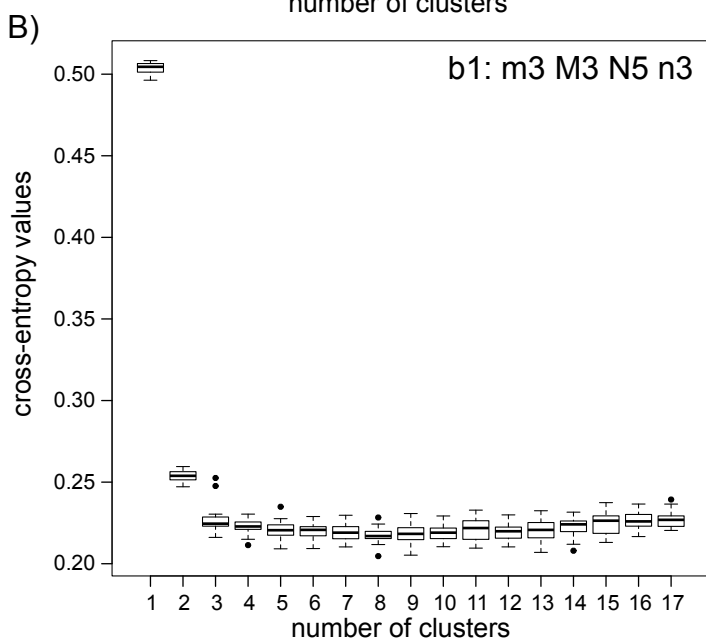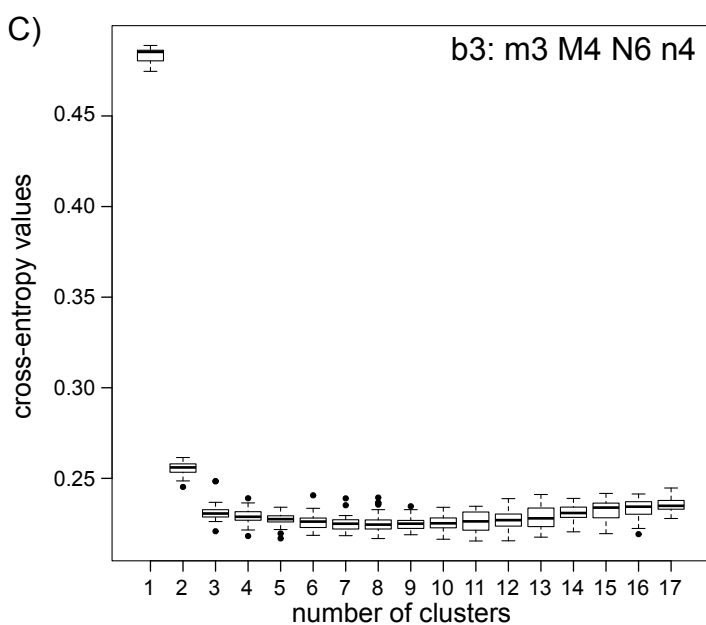

**Figure S2.** Standard boxplots of cross-entropy values (30 repeats) of sNMF analysis for the filtered ddRAD dataset. A, B and C show boxplots for the different stacks settings.
